# Supplementary material for: The development and use of Actiphage® to detect viable mycobacteria from bovine tuberculosis and Johne’s disease‐infected animals
Source: PubMed Central journal article supplement (PMC7111073; doi:10.1111/1751-7915.13518), 2019-12-03
Supplement: MBT2-13-738-s001.pdf [file MBT2-13-738-s001.pdf]

1 **Title**

2 A new method to detect and identify viable mycobacterial pathogens in clinical blood  
3 samples within 6 h

4

5 **Authors**

6 Benjamin M. C. Swift<sup>1#</sup>, Nathan Meade<sup>2</sup>, Elsa Sandoval Barron<sup>3</sup>, Malcolm Bennett<sup>3</sup>,

7 Richard J. Sibley<sup>4</sup>, Valerie Hughes<sup>5</sup>, Karen Stevenson<sup>5</sup>, Catherine E. D. Rees<sup>2</sup>

8 **Supplementary materials**

9 **Figure S1. Determination of eclipse phase of D29 infection of *M. smegmatis*,**

10 **MAP and *M. bovis* BCG**

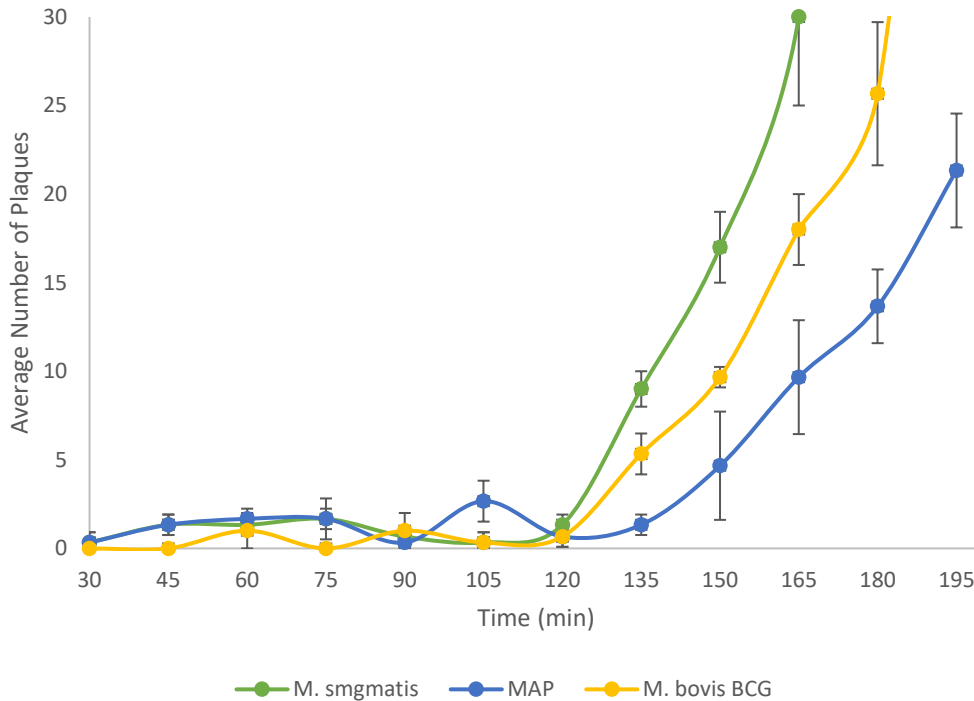

11

12 Graph showing the time taken for new D29 bacteriophage virions to be released from *M.*  
13 *smegmatis* (green), MAP (blue) and *M. bovis* BCG (orange). Samples were taken after an  
14 initial incubation of 30 min to allow phage adsorption to the host cells. Error bars represent  
15 the standard deviations of the means of number of plaques recovered from the phage  
16 assay performed in quadruple. The eclipse phase is defined as the time taken for new  
17 particles to be released from the cells after infection, thus the period when no phage are  
18 detected outside of the host cell.

19

20 **Figure S2. Schematic of One Day Method**

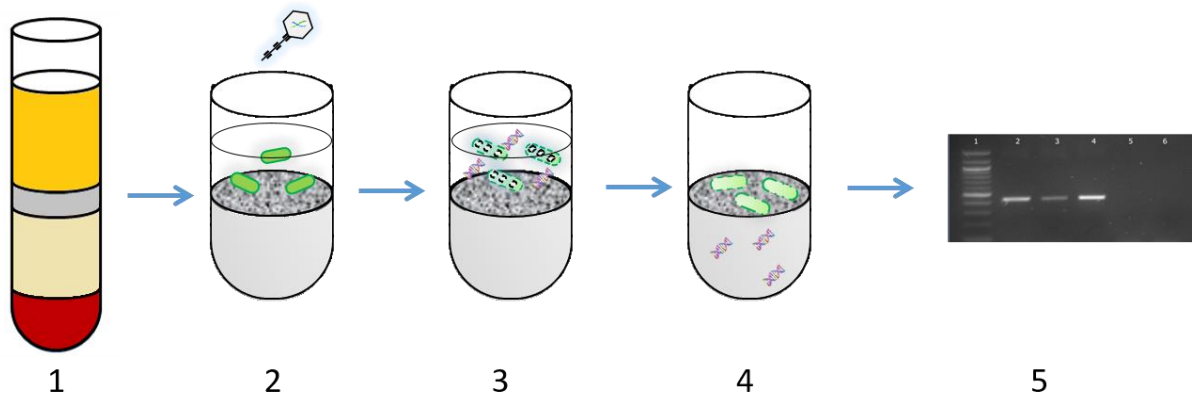

21

22 One Day method begins with the preparation of PBMCs from blood sample (1), which is  
23 placed into the top half of a filtered tube, and phage are added (2). Sample is incubated  
24 at 37 °C for 3 h to allow phage to infect, replicate and lyse their host (3). Sample is  
25 centrifuged through filter, separating released mycobacterial DNA from large cell debris  
26 (4). DNA is then cleaned and concentrated before amplified by PCR (5).

27  
28

**Table S1 Detection of MTB complex cells using the of the One Day, phage assay and culture of naturally TB infected cattle**

| <b>Sample Number</b> | <b>No. of Plaques</b> | <b>IS6110 RPA result</b> | <b>One Day Method</b> | <b>PM Result</b> | <b>Culture</b> |
|----------------------|-----------------------|--------------------------|-----------------------|------------------|----------------|
| <b>1</b>             | 63                    | +ve                      | +ve                   | VL               | -ve            |
| <b>2</b>             | 27                    | +ve                      | +ve                   | NVL              | -ve            |
| <b>3</b>             | 43                    | +ve                      | +ve                   | VL               | -ve            |
| <b>4</b>             | 22                    | +ve                      | +ve                   | VL               | -ve            |
| <b>5</b>             | 60                    | +ve                      | +ve                   | VL               | -ve            |
| <b>6</b>             | 36                    | +ve                      | +ve                   | VL               | -ve            |
| <b>7</b>             | 11                    | +ve                      | +ve                   | VL               | -ve            |
| <b>8</b>             | 14                    | +ve                      | +ve                   | VL               | -ve            |
| <b>9</b>             | 35                    | +ve                      | +ve                   | VL               | -ve            |
| <b>10</b>            | 15                    | +ve                      | +ve                   | NVL              | -ve            |
| <b>11</b>            | 14                    | +ve                      | +ve                   | NVL              | -ve            |
| <b>12</b>            | 25                    | +ve                      | +ve                   | NVL              | -ve            |
| <b>13</b>            | 43                    | +ve                      | +ve                   | NVL              | -ve            |
| <b>14</b>            | 26                    | +ve                      | +ve                   | VL               | -ve            |
| <b>15</b>            | 3                     | +ve                      | +ve                   | NVL              | -ve            |
| <b>16</b>            | 4                     | +ve                      | +ve                   | NVL              | -ve            |
| <b>17</b>            | 5                     | +ve                      | +ve                   | NVL              | -ve            |
| <b>18</b>            | 20                    | +ve                      | +ve                   | NVL              | -ve            |
| <b>19</b>            | 7                     | +ve                      | +ve                   | NVL              | -ve            |
| <b>20</b>            | 0                     | NA                       | +ve                   | NVL              | -ve            |
| <b>21</b>            | 2                     | +ve                      | +ve                   | NVL              | -ve            |
| <b>22</b>            | 0                     | NA                       | +ve                   | NVL              | -ve            |
| <b>23</b>            | 16                    | +ve                      | +ve                   | VL               | -ve            |
| <b>24</b>            | 0                     | NA                       | +ve                   | VL               | -ve            |
| <b>25</b>            | 8                     | +ve                      | +ve                   | VL               | -ve            |
| <b>26</b>            | 0                     | NA                       | -ve                   | NVL              | -ve            |
| <b>27</b>            | 8                     | +ve                      | +ve                   | NVL              | -ve            |
| <b>28</b>            | 7                     | -ve                      | +ve                   | NVL              | -ve            |
| <b>29</b>            | 0                     | NA                       | +ve                   | NVL              | -ve            |
| <b>30</b>            | 24                    | +ve                      | +ve                   | NVL              | -ve            |
| <b>31</b>            | 16                    | -ve                      | -ve                   | NVL              | -ve            |
| <b>32</b>            | 0                     | NA                       | +ve                   | NVL              | -ve            |
| <b>33</b>            | 0                     | NA                       | +ve                   | NVL              | -ve            |
| <b>34</b>            | 0                     | NA                       | +ve                   | VL               | -ve            |
| <b>35</b>            | 0                     | NA                       | +ve                   | NVL              | -ve            |
| <b>36</b>            | 8                     | +ve                      | +ve                   | NVL              | -ve            |
| <b>37</b>            | 32                    | +ve                      | +ve                   | NVL              | -ve            |
| <b>38</b>            | 23                    | +ve                      | +ve                   | NVL              | -ve            |
| <b>39</b>            | 3                     | -ve                      | +ve                   | NVL              | -ve            |
| <b>40</b>            | 1                     | -ve                      | +ve                   | NVL              | -ve            |
| <b>41</b>            | 0                     | NA                       | +ve                   | NVL              | -ve            |

29 No. of plaques – number of plaques observed from the phage-RPA assay

- 30 RPA- recombinase polymerase amplification
- 31 PM – post-mortem
- 32 Culture – denotes the attempt to culture mycobacteria from the clinical blood samples
